# Supplementary material for: Efficient NO2 sensing performance of a low-cost nanostructured sensor derived from molybdenite concentrate
Source: Royal Society of Chemistry journal article supplement (doi:10.1039/d0gc02779k), 2020-01-01
Supplement: d0gc02779k1.pdf [file d0gc02779k1.pdf]

# Supplementary Material

## Efficient NO<sub>2</sub> sensing performance of low-cost nanostructured sensor derived from molybdenite concentrate

Mirabbos Hojamberdiev<sup>a,\*</sup>, Neeraj Goel<sup>b</sup>, Rahul Kumar<sup>b</sup>, Zukhra C. Kadirova<sup>c</sup>, and Mahesh Kumar<sup>b</sup>

*<sup>a</sup>Institut für Chemie, Technische Universität Berlin, Straße des 17. Juni 135, 10623 Berlin, Germany*

*<sup>b</sup>Department of Electrical Engineering, Indian Institute of Technology Jodhpur, Jodhpur-342037, India*

*<sup>c</sup>Department of Inorganic Chemistry, Faculty of Chemistry, National University of Uzbekistan,  
University Street 4, 100174 Tashkent, Uzbekistan*

---

\*Corresponding Author. Phone: +49 (0) 30 314-26178. Fax: +49 (0) 30 314-79656. E-mail:

[khujamberdiev@tu-berlin.de](mailto:khujamberdiev@tu-berlin.de)

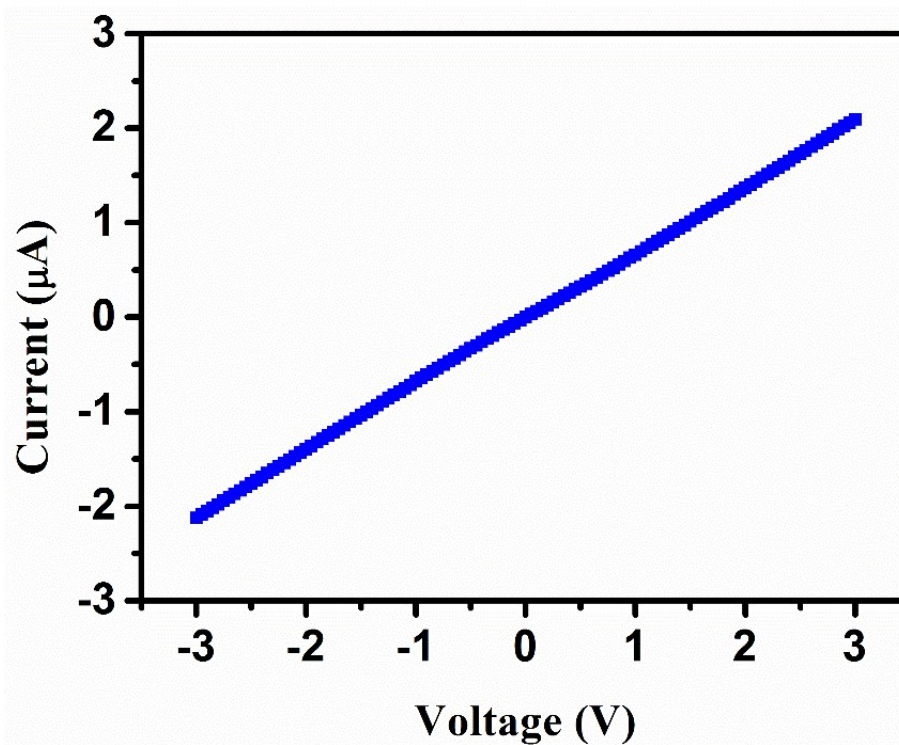

**Figure S1.** Current-voltage ( $I$ - $V$ ) characteristic curve of the fabricated sensing device.

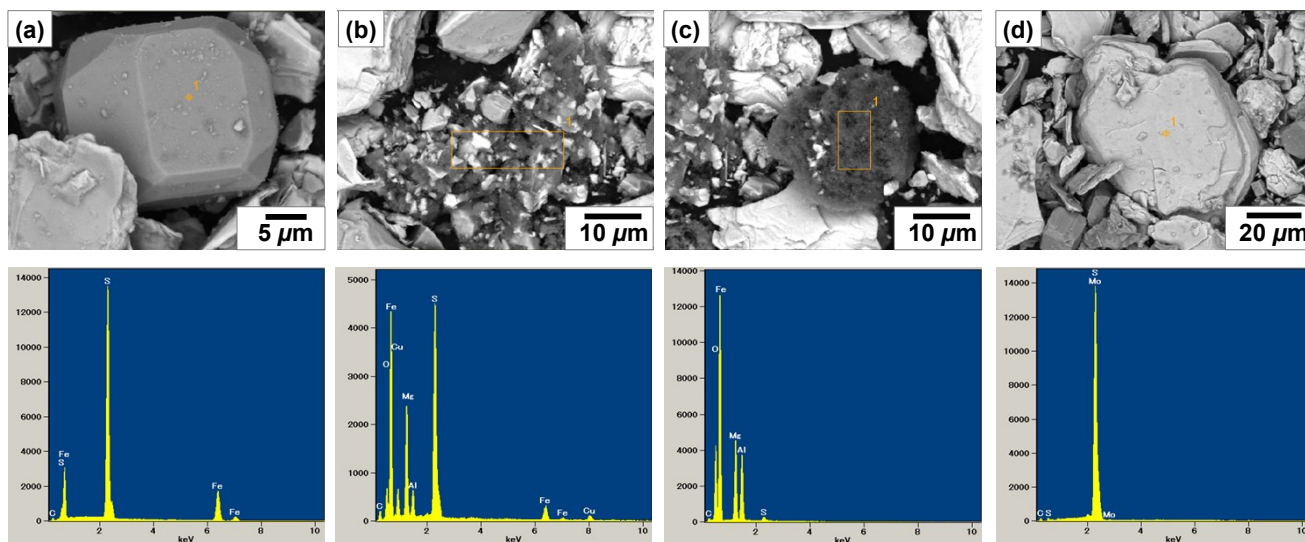

**Figure S2.** BSE-SEM images and EDX spectra of different particles of molybdenite concentrate

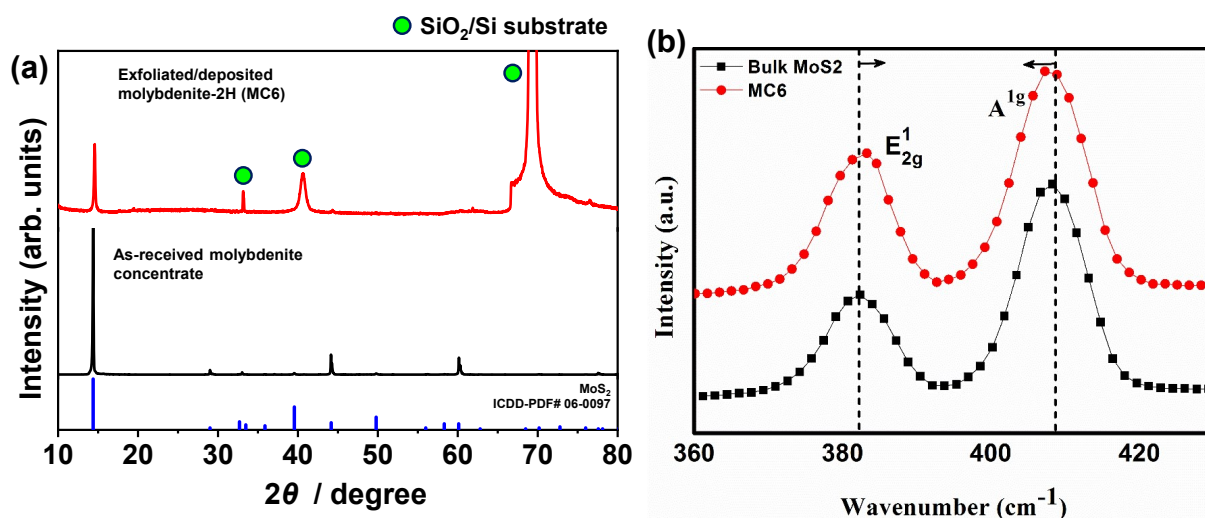

**Figure S3.** (a) XRD patterns of as-received molybdenite concentrate and exfoliated/deposited molybdenite-2H (sample MC6) and (b) Raman spectra of bulk MoS<sub>2</sub> and exfoliated MoS<sub>2</sub>.

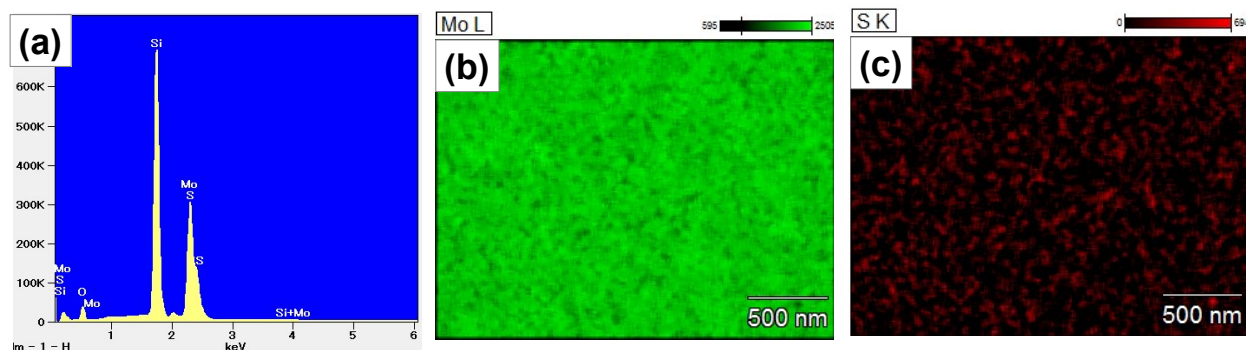

**Figure S4.** EDX spectrum (a) and EDX elemental mapping images Mo (b) and S (c) of MC3 sample.

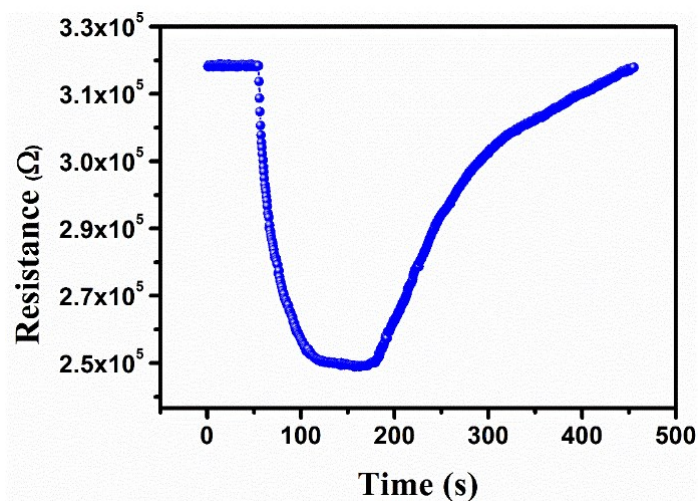

**Figure S5.** Sensing performance of molybdenite concentrate without removing any impurities against 10 ppm of NO<sub>2</sub> at 120°C.

**Table S1.** Comparison of NO<sub>2</sub> sensing performance of the device fabricated using molybdenite concentrate with previously reported data.

| Material                    | Fabrication technique            | Gas analyte     | Gas concentration, % | Gas response, % | Temperature, °C | Ref.      |
|-----------------------------|----------------------------------|-----------------|----------------------|-----------------|-----------------|-----------|
| <i>p</i> -MoS <sub>2</sub>  | Liquid exfoliation               | NO <sub>2</sub> | 1                    | 1.29            | 150             | [1]       |
| <i>n</i> -MoS <sub>2</sub>  | Liquid exfoliation               | NO <sub>2</sub> | 1                    | 5.80            | 200             | [1]       |
| MoS <sub>2</sub>            | CVD                              | NO <sub>2</sub> | 100                  | 35.16           | RT              | [2]       |
| MoS <sub>2</sub>            | Hydrothermal                     | NO <sub>2</sub> | 100                  | 40.3            | 150             | [3]       |
| 3D MoS <sub>2</sub> aerogel | Two-step sulfurization treatment | NO <sub>2</sub> | 0.5                  | 12              | 200             | [4]       |
| MoS <sub>2</sub>            | Mechanical exfoliation           | NO <sub>2</sub> | 1000                 | 1372            | RT              | [5]       |
| MoS <sub>2</sub>            | CVD                              | NO <sub>2</sub> | 10                   | 10.36           | RT              | [6]       |
| Molybdenite-2H              | Liquid nitrogen exfoliation      | NO <sub>2</sub> | 100                  | 67              | 50              | this work |

- 1 M. Donarelli, S. Prezioso, F. Perrozzi, F. Bisti, M. Nardone, L. Giancaterini, C. Cantalini, L. Ottaviano, Response to NO<sub>2</sub> and other gases of resistive chemically exfoliated MoS<sub>2</sub>-based gas sensors, *Sens. Actuators B*, 2015, **207**, 602–613.
- 2 R. Kumar, N. Goel, M. Kumar, UV-activated MoS<sub>2</sub> based fast and reversible NO<sub>2</sub> sensor at room temperature, *ACS Sens.*, 2017, **2**, 1744–1752.
- 3 Y. Li, Z. Song, Y. Li, S. Chen, S. Li, Y. Li, H. Wang, Z. Wang, Hierarchical hollow MoS<sub>2</sub> microspheres as materials for conductometric NO<sub>2</sub> gas sensors, *Sens. Actuators B*, 2019, **282**, 259–267.
- 4 H. Long, L. Chan, A. Harley-Trochimczyk, L.E. Luna, Z. Tang, T. Shi, A. Zettl, C. Carraro, M.A. Worsley, R. Maboudian, 3D MoS<sub>2</sub> aerogel for ultrasensitive NO<sub>2</sub> detection and its tunable sensing behaviour, *Adv. Mater. Interfaces*, 2017, **4**, 1700217.
- 5 D.J. Late, Y.-K. Huang, B. Liu, J. Acharya, S.N. Shirodkar, J. Luo, A. Yan, D. Charles, U.V. Waghmare, V.P. Dravid, C.N.R. Rao, Sensing Behavior of Atomically Thin-Layered MoS<sub>2</sub> Transistors, *ACS Nano*, 2013, **7**, 4879–4891.
- 6 A.V. Agrawal, R. Kumar, S. Venkatesan, A. Zakhidov, G. Yang, J. Bao, M. Kumar, M. Kumar, Photoactivated mixed in-plane and edge-enriched p-type MoS<sub>2</sub> flake-based NO<sub>2</sub> sensor working at room temperature, *ACS Sens.*, 2018, **3**, 998–1004.
